# Supplementary material for: Thermally responsive behaviour of the electrical resistance of electrospun P(NIPAm-co-NMA)/Ag composite nanofibers
Source: Royal Society of Chemistry journal article supplement (doi:10.1039/c4ra12662a), 2014-12-16
Supplement: c4ra12662a1.pdf [file c4ra12662a1.pdf]

## Thermal responsive behaviour of the electrical resistance of electrospun P(NIPAm-co-NMA)/Ag composite nanofibers

Hui Li,<sup>a,b</sup> Guoping Zhang,<sup>a</sup> Libo Deng,<sup>\*a</sup> Rong Sun,<sup>\*a</sup> and Yangxing Ou<sup>b</sup>

<sup>a</sup>Shenzhen Institutes of Advanced Technology, Chinese Academy of Sciences, Shenzhen, 518055, China

<sup>b</sup>College of Materials Science and Engineering, Shenzhen University, Shenzhen, 518060, China

### Electronic Supplementary Information

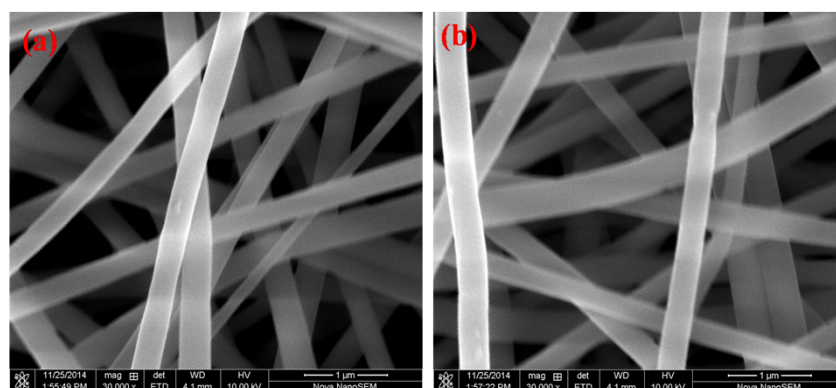

Fig. S1 High-magnification SEM images of (a) the as-prepared and (b) the heat-treated P(NIPAM-co-NMA) fibers.

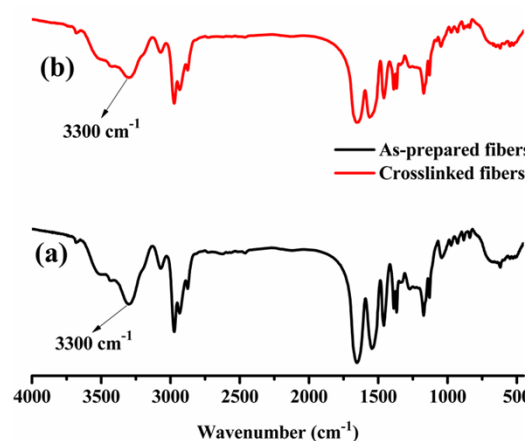

Fig. S2 FTIR spectra of (a) the as-prepared and (b) the crosslinked P(NIPAM-co-NMA) fibers.

\* Corresponding authors: [Denglb@siat.ac.cn](mailto:Denglb@siat.ac.cn) and [Rong.sun@siat.ac.cn](mailto:Rong.sun@siat.ac.cn); Tel: +86-0755-86392158

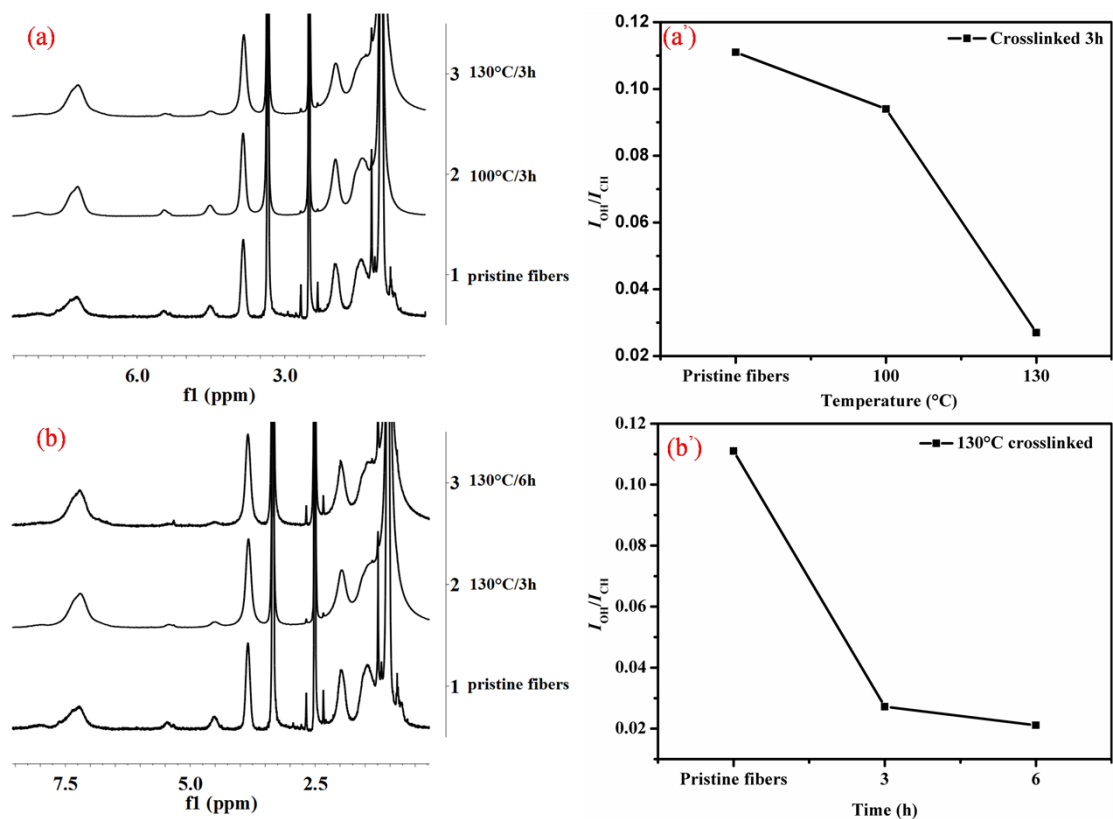

Fig. S3 <sup>1</sup>H-NMR spectra and the  $I_{OH}/I_{CH}$  ratio of the P(NIPAm-co-NMA) fibers at different stages: (a) baked for 3 h at different temperatures and (b) baked at 130 °C for different durations.

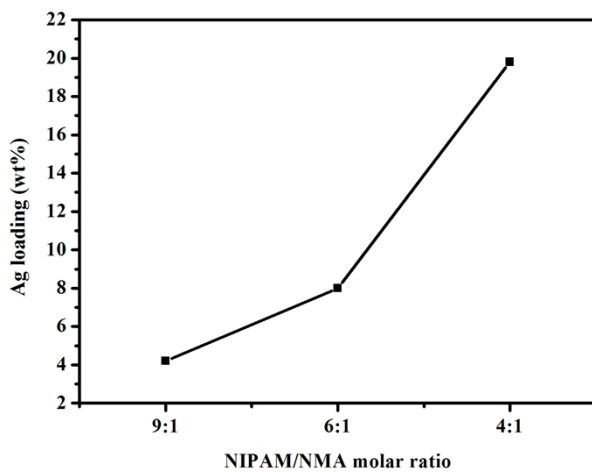

Fig. S4 The dependence of Ag weight percent on the molar ratio between the monomers in the composite fibers.

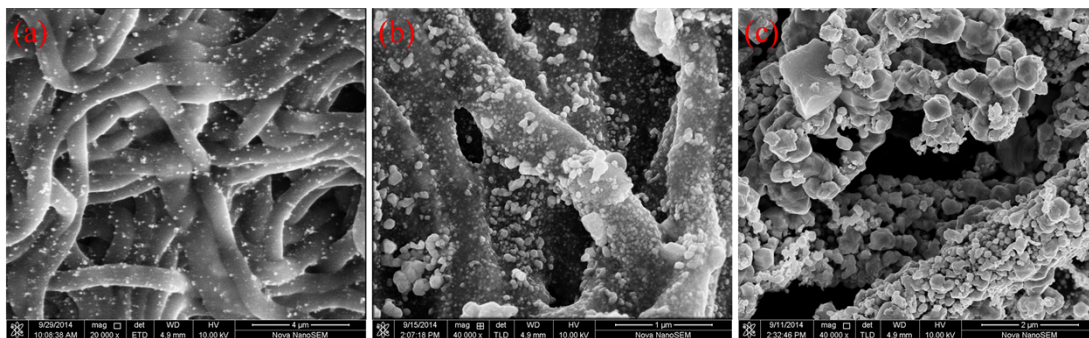

Fig. S5 High-magnification SEM images of: (a) PNN/Ag-0.01, (b) PNN/Ag-0.05 and (c) PNN/Ag-0.1 fibers.
